# Supplementary material
Source: PubMed Central journal article supplement (PMC4503499)
Supplement: NIHMS679700-supplement-Supp_MaterialS1.pdf [file NIHMS679700-supplement-Supp_MaterialS1.pdf]

Sister Study occupational exposure history questionnaire

Now I'm going to ask about specific chemicals and other materials that you have ever used in any of the jobs you have held.

| 1. Have you handled [MATERIAL] at least once a week in any job you have had?                                                                                             | 2. How many years and/or months in all have you worked with [MATERIAL] at least once a week? | 3. During the [months/years] you worked with [MATERIAL] about how many days per week or per month did you handle them? |
|--------------------------------------------------------------------------------------------------------------------------------------------------------------------------|----------------------------------------------------------------------------------------------|------------------------------------------------------------------------------------------------------------------------|
| a. gasoline or any other petroleum products<br>Yes<br>No                                                                                                                 | ____ ____<br>Years      Months                                                               | ____ ____<br># Days<br>Week   Month   Year   In Total                                                                  |
| b. any solvents, such as benzene, toluene, naphthalene and so forth<br>Yes<br>No                                                                                         | ____ ____<br>Years      Months                                                               | ____ ____<br># Days<br>Week   Month   Year   In Total                                                                  |
| c. any dyes or inks<br>[Do not include using or handling pens, markers, or other writing instruments, or handling toner cartridges for copies or printers.]<br>Yes<br>No | ____ ____<br>Years      Months                                                               | ____ ____<br># Days<br>Week   Month   Year   In Total                                                                  |
| d. any paints<br>Yes<br>No                                                                                                                                               | ____ ____<br>Years      Months                                                               | ____ ____<br># Days<br>Week   Month   Year   In Total                                                                  |
| e. any stains or varnishes<br>Yes<br>No                                                                                                                                  | ____ ____<br>Years      Months                                                               | ____ ____<br># Days<br>Week   Month   Year   In Total                                                                  |
| f. any pesticides<br>Yes<br>No                                                                                                                                           | ____ ____<br>Years      Months                                                               | ____ ____<br># Days<br>Week   Month   Year   In Total                                                                  |
| g. any acids<br>Yes<br>No                                                                                                                                                | ____ ____<br>Years      Months                                                               | ____ ____<br># Days<br>Week   Month   Year   In Total                                                                  |
| h. any lubricating oils<br>Yes<br>No                                                                                                                                     | ____ ____<br>Years      Months                                                               | ____ ____<br># Days<br>Week   Month   Year   In Total                                                                  |
| i. any glues or adhesives<br>[Do not include adhesives tapes of any kind.]<br>Yes<br>No                                                                                  | ____ ____<br>Years      Months                                                               | ____ ____<br># Days<br>Week   Month   Year   In Total                                                                  |

|                                                                                                                                                                                                                        |                                            |                                                       |
|------------------------------------------------------------------------------------------------------------------------------------------------------------------------------------------------------------------------|--------------------------------------------|-------------------------------------------------------|
| j. any soldering materials<br><br>Yes<br>No                                                                                                                                                                            | ____ ____<br>Years                  Months | ____ ____<br># Days<br>Week   Month   Year   In Total |
| k. any metals<br>[Do not include handling finished metal products like pens, paper clips, filing cabinets, or tools. Only include working with metal being used in the production of something else.]<br><br>Yes<br>No | ____ ____<br>Years                  Months | ____ ____<br># Days<br>Week   Month   Year   In Total |
| l. dust from sand rock, clay or brick<br><br>Yes<br>No                                                                                                                                                                 | ____ ____<br>Years                  Months | ____ ____<br># Days<br>Week   Month   Year   In Total |
| m. animal parts, carcasses, blood, or raw meat<br><br>Yes<br>No                                                                                                                                                        | ____ ____<br>Years                  Months | ____ ____<br># Days<br>Week   Month   Year   In Total |
| n. x-rays<br><br>Yes<br>No                                                                                                                                                                                             | ____ ____<br>Years                  Months | ____ ____<br># Days<br>Week   Month   Year   In Total |
